# Supplementary material
Source: bioRxiv or medRxiv preprint supplement (https://www.biorxiv.org/highwire/filestream/45789/field_highwire_adjunct_files/3/119420-12.pdf)

accessory binary tree  
(114 strains)

gene presence/absence  
matrix (59,989 genes)

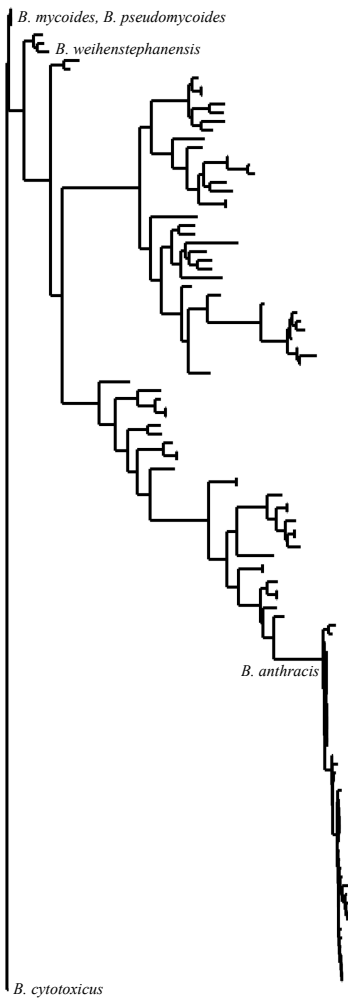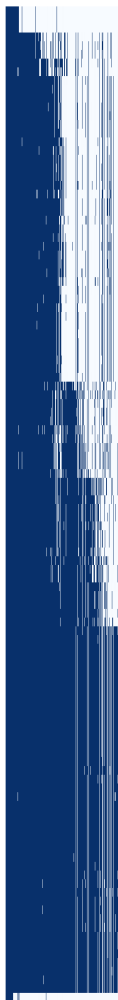

Supplement: Supplementary file [file 119420-12.pdf]
